1 **Prevalence and predictors of self-medication for COVID-19 among slum dwellers in Jinja City,**  
2 **Uganda**

3

4 **Short title: Self medication for covid-19**

5

6 **Authors**

7 Prossy Nakito<sup>1\*</sup>, Angela N. Kisaky<sup>2,3</sup>, Abel Wilson Walekhwa<sup>4,5</sup>, Gloria Tumukunde<sup>3</sup> Charity Mutesi<sup>3</sup>,

8 Nicholas Muhumuza<sup>3</sup>, Carolyne Nyamor<sup>3</sup>, David Musoke<sup>5</sup>, Geoffrey Musinguzi<sup>5</sup>, Dathan M.

9 Byonanebye<sup>1,6</sup>

10 Affiliations:

11 <sup>1</sup>Department of Community Health and Behavioural Sciences, School of Public Health, Makerere  
12 University, Kampala, Uganda

13 <sup>2</sup>African Field Epidemiology Network Lugogo House, Plot 42 Lugogo By-Pass, Kampala

14 <sup>3</sup>Makerere University School of Public Health, Department of Health Policy Planning and Management.

15 <sup>4</sup>Diseases Dynamics Unit, Department of Veterinary Medicine, University of Cambridge,  
16 United Kingdom

17 <sup>5</sup>Department of Disease Control and Environmental Health, University School of Public Health.

18 <sup>6</sup>Kirby Institute, University of New South Wales, Sydney, Australia

19

20 **\*Corresponding author and address:** Prossy Nakito

21 Department of Community Health and Behavioural Sciences

22 School of Public Health, Makerere University, Kampala Uganda

23 Email: [prossynakito@gmail.com](mailto:prossynakito@gmail.com)

24

25

26 **Abstract**

27

28 **Introduction:** Self-medication is a serious public health concern globally and is more prevalent in  
29 underserved populations, especially in resource limited settings. The lack of effective treatment for COVID-  
30 19 and poor access to healthcare were drivers of self-medication. We investigated the prevalence and  
31 associated factors with self-medication for COVID-19 among slum dwellers in a Ugandan slum.

32 **Methods and materials:** We conducted a cross-sectional study using randomly selected respondents from  
33 slums in Jinja city, Uganda. Households were proportionately selected from the slums and one participant  
34 with confirmed or self-reported COVID-19 during 2021 was recruited. Poisson regression with robust  
35 standard errors was used to determine the crude (CPR) and adjusted prevalence ratios (APR) (95% CI) of  
36 factors associated with self-medication. Variables were selected apriori and backward elimination approach  
37 used to fit the final multivariate model in which variables with a  $P \leq 0.05$  were included.

38 **Results:** Overall, 517 respondents were recruited, median age (years) was 31 (26-40), and 59% were male.  
39 The prevalence of self-medication for COVID-19 was 87.23% (451/517), 95% CI: [84.00%-90.00%] and  
40 56% knew that self-medication was dangerous. Age  $\geq 50$  years, compared to 20-29 years [APR: 1.12, 95%  
41 CI: 1.05, 1.20], being female [APR: 1.07, 95% CI: 1.02, 1.13], minor [APR: 1.62, 95% CI: 1.25, 2.11], and  
42 severe symptoms [APR: 1.51, 95% CI: 1.16, 1.96], access to internet [APR: 1.13, 95% CI: 1.07, 1.20].  
43 Having medical insurance [APR: 0.63, 95% CI: 0.46, 0.87] and awareness about laws against self-  
44 medication [APR: 0.89, 95% CI: 0.81, 0.97] were associated with a lower risk of self-medication.

45 **Conclusion:** The prevalence of self-medication in slum dwellers in Uganda was high despite high  
46 awareness about its dangers. Self-medication was common in those with severe symptoms and those access  
47 to internet. There is need to control infodemia and improve health insurance cover in informal settlements  
48 within Uganda.

49 **Keywords:** *Self-medication, COVID-19, Slum dwellers, Confirmed COVID-19, Self-reported COVID-19*

50 **Introduction**

51

52 While Africa did not registered very high incidence of Coronavirus disease 2019 (COVID-19) compared  
53 to the rest of the world, the disease had significant impact on people living in informal settlements. As of  
54 February 2023, the World Health Organization (WHO) estimated that there were more than 9.4 million  
55 cases of COVID-19, with approximately 173,295 deaths [1, 2]. Uganda experienced a first wave and a more  
56 serious second wave between November to December 2020 and April to June 2021, respectively [3]. The  
57 second wave of the pandemic was fuelled by five different variants and a high mortality rate, estimated at  
58 36% [4]. Cumulatively, the country had reported 170,409 confirmed cases and 3,630 deaths by February  
59 28<sup>th</sup>, 2023 [5]. Amidst this burden, effective treatments for COVID-19 were not accessible in Africa, and  
60 the government treatment guidelines focused on symptom management [2].

61 COVID-19 impacted nearly every sector of development the world over. The health sector was not spared  
62 and it experienced monumental challenges in trying to cope with and respond to the pandemic [6]. Several  
63 countries instituted strategies such as restrictions on travel to reduce disease transmission and the burden  
64 on the health [7, 8]. However, in resource limited settings, these measures exacerbated the existing  
65 challenge of limited access to health services, especially in underserved communities. The infodemia  
66 around COVID-19 infection, overstretched health systems and limitations in access to health services  
67 exacerbated self-medication [9]. The World Health Organization (WHO) identified self-medication as a  
68 significant public health issue with risks if not used properly [10]. It defines self-medication as the selection  
69 and utilization of medicines to treat self-recognized symptoms or ailments without consulting a physician  
70 [11]. It also includes the usage or re-usage of previously prescribed or unused drugs; direct purchasing of  
71 prescription drugs without consultation; and irrational use of over-the-counter medications [12].

72 The effects of self-medication includes antimicrobial resistance, drug interactions, addiction or dependence,  
73 and drug toxicity [13]. Potential risks of self-medication include incorrect self-diagnosis, adverse reactions,  
74 dangerous drug interactions, incorrect administration, incorrect dosage, incorrect therapy selection,

75 masking of a severe disease, and the risk of drug dependence and abuse [14, 15]. Although the prevalence  
76 and correlates of self-medication have been widely discussed in many countries [16], there is limited data  
77 on the prevalence and factors associated with self-medication in underserved populations in informal  
78 settlements. We estimated the prevalence, and factors associated with self-medication for COVID-19  
79 amongst urban slum dwellers in Jinja City.

## 80 **Methods**

81

### 82 **Study design**

83 This was a cross-sectional study among adult urban slum dwellers aged 18 years and above who reported  
84 having had confirmed or self-reported COVID-19 during the study period from January to December 2021.

### 85 **Study Area**

86 This study was carried out in Jinja city in Eastern Uganda, a region with an estimated population of 331,079  
87 people [17]. Jinja City has eight slum but this study was conducted in five randomly selected slums. The  
88 city also houses several educational institutions, commercial centres, industries, and factories, hence a  
89 growing sprawl of unplanned settlements. This has given rise to several slum communities around the city,  
90 which, among others, face a myriad of challenges, including poverty, poor health service delivery, and  
91 illiteracy. Slum dwellers sought treatment from drug shops or stores, public hospitals [18], local pharmacy  
92 [19], road-side herbalists [20] and traditional healers [20]. In Uganda, health care is provided in both private  
93 and public health centres. Uganda provides primary health care through its National Minimum Health Care  
94 Package at the lowest level health centres, while tertiary care is provided at the highest level health centres  
95 [21]. The largest public health facility in Jinja district is Jinja Regional Referral Hospital, which provides  
96 tertiary services, while several lower-level health facilities serve the majority of the population.

97

98

99

100 **Study population**

101 Participants who were non-residents, and adults not capable of giving consent for any reason (mentally ill,  
102 critically sick, and those not able to respond), were excluded from the study as they did not represent the  
103 true residents of the slums.

104 **Sample size determination**

105 The minimum sample size was estimated using the Kish Leslie sample size estimation formula for cross-  
106 sectional studies [22]. In this study, we used a self-medication prevalence of 72% previously reported in  
107 Namuwongo, a slum in Kampala [23] to estimate a sample size of 314. Through multistage sampling, the  
108 estimated sample size was adjusted with a design effect of 1.5. Therefore, with a sample size of 518  
109 respondents, this study had 80% power to determine the prevalence of self-medication at 95% confidence  
110 interval.

111 **Sampling Procedures and participant recruitment**

112

113 A multi-stage sampling strategy was employed to select study respondents. Five slums were randomly  
114 selected for this study out of eight slums in the study area, three slums were randomly selected in Southern  
115 Division and two slums in Northern Division.

116 In the first stage, the researchers used a stratified sampling method in which five of Jinja's eight slums were  
117 randomly selected and proportionate to their size. In the second stage, the researcher selected households  
118 from the five selected slums. Later, a systematic sampling technique was further used, where every 41<sup>st</sup>  
119 household (derived when we divided 21,284 total households by the 518-sample size calculated) was  
120 selected to reach the desired number of respondents per slum. This was done with the guidance of the local  
121 council leaders and/or Village Health Team (VHT) members. The local council or VHT members assisted  
122 in guiding the researchers to locate the boundaries of each slum, provided a list of households in each slum,  
123 and introduced the researchers to the community and the selected households. For the third stage, simple  
124 random sampling was used to select a participant in each household where more than one person met the

125 inclusion criteria. The Kish Grid was used to select the required participant to avoid selection bias [24, 25].  
126 Where there was no eligible person, the next household with an eligible respondent was selected. This was  
127 continued until the desired number of respondents of 518 was reached.

## 128 **Data collection methods and tools**

129

130 A questionnaire was used to obtain quantitative data from the study respondents. The questionnaire used  
131 was adapted from previous studies [26-28] and modified to fit our study. The tool was translated into the  
132 local '*Lusoga*' by language expert and pre-tested in Polota slum, which is similar to the Jinja city slums.  
133 The Cronbach's Alpha coefficient reliability test was used to assess the data collection tool's validity  
134 (coefficient alpha=0.83). The questionnaire was then uploaded onto KoBo Toolbox tool version 2022.1.2,  
135 a mobile phone application for data collection [29]. Data were collected by research assistants who were  
136 conversant with both the local language and English. Study respondents received consent from all  
137 respondents prior to the interviews. Data were collected using semi-structured questions installed on the  
138 KoBo Toolbox application tool version 2022.1.2.

139 Participants were asked (Yes/No) if they used any medications (medicines and herbs) for self-medication  
140 during COVID illness without a prescription or consultation with a medical practitioner/physician.  
141 Participants were also interviewed on several demographic and social characteristics. The characteristics  
142 were categorised as either predisposing, enabling, or need factors. Predisposing factors included: age, sex,  
143 ethnicity, occupation, education level, cultural beliefs, and societal influences. Enabling factors refer to  
144 availability constraints and included household income, medical insurance, proximity to medical services,  
145 advertisements, sources of advice, and legislation. Need factors are those which trigger the action to self-  
146 medicate, such as type of illness, duration of illness, the severity of illness, history of illness, and health  
147 status.

148 **Data management and analysis**

149

150 The data collected were transferred into Microsoft Excel software and then STATA version 14.0 for further  
151 statistical analysis. Data cleaning was done by checking for variables with missing data and duplicates as  
152 well as transforming variables from string to numerical for analysis purposes to come up with a complete  
153 dataset. Outliers were identified using geographical methods and a Q–Q plot (quantile-quantile plot). The  
154 prevalence of self-medication for COVID-19 and symptoms suffered by slum dwellers was estimated.

155 **Statistical analysis**

156

157 The factors associated with self-medication for COVID-19 were determined using Poisson regression with  
158 robust standard errors. We determined the crude prevalence ratios (cPR) and adjusted prevalence ratios  
159 (APR) and 95% confidence intervals (CIs) for several covariates associated with self-medication for  
160 COVID-19. The backward elimination method was used and variables with a P-value  $\leq 0.20$  were  
161 considered at multivariable stage modelling stage. Only independent variables with a p-value  $\leq 0.05$  were  
162 considered significant. All estimates were reported with a 95% confidence interval. Multi-collinearity was  
163 checked using scatter plots and no variables had correlation coefficient greater than 0.4. The model with  
164 the least Akaike information criterion (AIC) and Bayesian information criterion (BIC) values was selected  
165 as the final model. The goodness of fit test was used to test the fitness of the final model.

166 **Ethical Considerations**

167

168 We obtained ethical approval to conduct this study from Makerere University, School of Public Health  
169 Higher Degrees Research and Ethics Committee (HDREC), approval number FWA00011353.  
170 Administrative clearance was also obtained from the Jinja city authorities. Written informed consent was  
171 obtained from all respondents before the interview. Confidentiality was maintained throughout the study.

172 **Results**

173 **Characteristics of study participants.**

174 A total of 517 respondents were interviewed representing 99.80% response rate. The median age of  
 175 respondents (IQR) was 31 (26-40) years and 40.42% (209/517) were within the age group of 30-39. In  
 176 addition, 58.99% (305/517) were males. Among the respondents, 52.80% (273/517) had attained  
 177 secondary-level education, 71.76% (371/517) were married while 50.68% (262/517) had a family monthly  
 178 income of less than 100,000 Uganda shillings (approximately  $\leq 26.32$  U.S. dollars), median income (IQR)  
 179 being 100,000 (50,000-300,000) **Table 1.**

180 **Table 1: Socio-demographic information of the respondents**

| Variable                    | Frequency (n=517)        | Percentage (%) |
|-----------------------------|--------------------------|----------------|
| <b>Age (years)</b>          |                          |                |
| 20-29                       | 125                      | 24.18          |
| 30-39                       | 209                      | 40.43          |
| 40-49                       | 105                      | 20.31          |
| $\geq 50$                   | 78                       | 15.09          |
| Median age (IQR) years      | 31 (26-40)               |                |
| <b>Sex</b>                  |                          |                |
| Male                        | 305                      | 59.99          |
| Female                      | 212                      | 41.01          |
| <b>Religion</b>             |                          |                |
| Anglican                    | 112                      | 21.66          |
| Catholic                    | 135                      | 26.11          |
| Muslim                      | 159                      | 30.75          |
| Pentecostal                 | 90                       | 17.41          |
| Other                       | 21                       | 4.06           |
| <b>Education</b>            |                          |                |
| No formal                   | 47                       | 9.09           |
| Primary                     | 137                      | 26.50          |
| Secondary                   | 273                      | 52.80          |
| Tertiary                    | 60                       | 11.61          |
| <b>Marital Status</b>       |                          |                |
| Never Married               | 97                       | 18.76          |
| Married                     | 371                      | 71.76          |
| Separated                   | 26                       | 5.03           |
| Widower/widow               | 23                       | 4.45           |
| <b>Monthly Income (UGX)</b> |                          |                |
| <100, 000                   | 262                      | 50.68          |
| 100,001-200,000             | 89                       | 17.21          |
| 200,001-300,000             | 68                       | 13.15          |
| 300,001-400,000             | 34                       | 6.58           |
| >400,000                    | 64                       | 12.38          |
| Median income (IQR)         | 100,000 (50,000-300,000) |                |

181 *IQR: Inter-quartile range*



182 **Prevalence of self-medication for COVID-19**

183 Overall, the prevalence of self-medication for COVID-19 was 87.23% (451/517), 95% CI: [84-90] among  
184 slum dwellers in Jinja. Of the 451 respondents who self-medicated for COVID-19, 56.76% (256/451)  
185 agreed that they were aware of the risks associated with self-medication, while 15.74% (71/451) disagreed.  
186 The most common symptoms suffered were difficulty in breathing, sore throat, loss of appetite, chest pain,  
187 fever and other (dizziness, vomiting, bloating of the stomach and hearing loss) symptoms. **Fig 1 Symptoms**  
188 **of COVID-19 among respondents who self-medicated**

189 **Factors associated with self-medication for COVID-19**

190 After controlling for potential confounders, being old (>50 years) [APR: 1.12, 95% CI:1.05, 1.20],  
191 female sex [APR: 1.07, 95% CI: 1.02, 1.13], symptoms severity: minor symptoms [APR: 1.62, 95% CI:  
192 1.25, 2.11]; severe symptoms [APR: 1.51, 95% CI: 1.16, 1.96], having medical insurance [APR: 0.63, 95%  
193 CI: 0.46, 0.87], access to internet [APR: 1.13, 95% CI: 1.07, 1.20], family/friends influence [APR: 1.27,  
194 95% CI: 1.12, 1.42], and anxiety/fear of being quarantined [APR: 1.35, 95% CI: 1.14, 1.60] were  
195 significantly associated with higher rates of self-medication for COVID-19. Being aware of laws against  
196 self-medication was also found to be associated with a lower risk of self-medication [APR: 0.89, 95% CI:  
197 0.81, 0.97]. On the other hand, having had a prior COVID-19 test, previous experience with the disease,  
198 health facility being far, long waiting time at the health facility, short duration of the disease or its  
199 symptoms, poor present health status, highest education levels, marital status and household monthly  
200 income were all found not statistically significant. **Table 2**

201

202

203

204

205 **Table 2: Bivariate and multivariable factors associated with self-medication among slum dwellers**  
 206 **in Jinja City**

| Variables                                                      | Have you ever self-medicated (n=517) |                    | CPR (95% CI)*     | APR (95%CI)**    | p-value          |
|----------------------------------------------------------------|--------------------------------------|--------------------|-------------------|------------------|------------------|
|                                                                | No n (%)<br>n=66                     | Yes n (%)<br>n=451 |                   |                  |                  |
| <b>Sex</b>                                                     |                                      |                    |                   |                  |                  |
| Male                                                           | 37 (17.45)                           | 175 (82.55)        | Ref               | Ref              |                  |
| Female                                                         | 29 (9.51)                            | 276 (90.49)        | 1.07 (1.02, 1.13) | 1.1 (1.0, 1.1)   | <b>0.006</b>     |
| <b>Age (years)</b>                                             |                                      |                    |                   |                  |                  |
| 20-29                                                          | 19(15.20)                            | 106(84.80)         | Ref               | Ref              |                  |
| 30-39                                                          | 29(13.88)                            | 180(86.12)         | 1.02(0.93, 1.11)  | 1.03(0.97, 1.09) | 0.384            |
| 40-49                                                          | 13(12.38)                            | 92(87.62)          | 1.03(0.93, 1.15)  | 1.05(0.98, 1.12) | 0.133            |
| 50+                                                            | 5(6.41)                              | 73(93.59)          | 1.10(1.00, 1.21)  | 1.12(1.05, 1.20) | <b>0.001</b>     |
| <b>Anxiety and or fear of quarantine</b>                       |                                      |                    |                   |                  |                  |
| No                                                             | 21(42.86)                            | 28(57.14)          | Ref               | Ref              |                  |
| Yes                                                            | 9(2.82)                              | 310(97.18)         | 1.70(1.33, 2.17)  | 1.35(1.14, 1.60) | <b>&lt;0.001</b> |
| <b>Have access to medical insurance</b>                        |                                      |                    |                   |                  |                  |
| No                                                             | 46(9.52)                             | 437(90.48)         | Ref               | Ref              |                  |
| Yes                                                            | 20(58.82)                            | 14(41.18)          | 0.46(0.30, 0.68)  | 0.63(0.46, 0.87) | <b>0.005</b>     |
| <b>Internet/ advertisement</b>                                 |                                      |                    |                   |                  |                  |
| No                                                             | 47(21.17)                            | 175(78.83)         | Ref               | Ref              |                  |
| Yes                                                            | 18(6.12)                             | 276(93.88)         | 1.19(1.11, 1.28)  | 1.13(1.07, 1.20) | <b>0.001</b>     |
| <b>Influenced by my family or friends</b>                      |                                      |                    |                   |                  |                  |
| No                                                             | 48(46.15)                            | 56(53.85)          | Ref               | Ref              |                  |
| Yes                                                            | 18(4.36)                             | 395(95.64)         | 1.78(1.48, 2.13)  | 1.27(1.12, 1.42) | <b>&lt;0.001</b> |
| <b>Aware of any law on medicine use</b>                        |                                      |                    |                   |                  |                  |
| No                                                             | 39(9.11)                             | 389(90.89)         | Ref               | Ref              |                  |
| Yes                                                            | 27(30.34)                            | 62(69.66)          | 0.77(0.67, 0.88)  | 0.89(0.81, 0.97) | <b>0.008</b>     |
| <b>Symptom severity</b>                                        |                                      |                    |                   |                  |                  |
| No symptoms                                                    | 39 (67.24)                           | 19 (32.76)         | Ref               | Ref              |                  |
| Minor symptoms                                                 | 11(5.14)                             | 203(94.86)         | 2.89(2.00, 4.19)  | 1.62(1.25, 2.11) | <b>&lt;0.001</b> |
| Severe symptoms                                                | 16(6.53)                             | 229(93.47)         | 2.85(1.97, 4.13)  | 1.51(1.16, 1.96) | <b>0.002</b>     |
| <b>Prior COVID-19 test</b>                                     |                                      |                    |                   |                  |                  |
| No                                                             | 22(7.12)                             | 287(92.88)         | Ref               | Ref              |                  |
| Yes                                                            | 18(11.69)                            | 136(88.31)         | 0.95(0.89,1.01)   | 1.01(0.96,1.06)  | 0.736            |
| <b>Previous experience with the disease</b>                    |                                      |                    |                   |                  |                  |
| No                                                             | 49(11.53)                            | 376(88.47)         | Ref               | Ref              |                  |
| Yes                                                            | 17(18.48)                            | 75(81.52)          | 0.92(0.83, 1.02)  | 0.96(0.89,1.03)  | 0.236            |
| <b>The health facility is far</b>                              |                                      |                    |                   |                  |                  |
| No                                                             | 49(11.64)                            | 372(88.36)         | Ref               | Ref              |                  |
| Yes                                                            | 17(17.71)                            | 79(82.29)          | 0.93(0.84, 1.03)  | 0.93(0.85,1.01)  | 0.091            |
| <b>Long waiting time at the health facility</b>                |                                      |                    |                   |                  |                  |
| No                                                             | 45(14.61)                            | 263(85.39)         | Ref               | Ref              |                  |
| Yes                                                            | 21(10.05)                            | 188(89.95)         | 1.05(0.99, 1.12)  | 0.01(0.96,1.06)  | 0.679            |
| <b>The short duration of the disease or its symptoms/signs</b> |                                      |                    |                   |                  |                  |
| No                                                             | 51(14.37)                            | 304(85.63)         | Ref               | Ref              |                  |
| Yes                                                            | 15(9.26)                             | 147(90.74)         | 1.06(0.99, 1.13)  | 1.02(0.97, 1.07) | 0.375            |

| <b>Poor present health status</b>       |           |            |                  |                  |       |
|-----------------------------------------|-----------|------------|------------------|------------------|-------|
| No                                      | 41(17.23) | 197(82.77) | Ref              | Ref              |       |
| Yes                                     | 25(8.96)  | 254(91.04) | 1.10(1.03, 1.18) | 0.97(0.92, 1.02) | 0.214 |
| <b>Education</b>                        |           |            |                  |                  |       |
| No education                            | 5(10.64)  | 42(89.36)  | Ref              | Ref              |       |
| Primary                                 | 15(10.95) | 122(89.05) | 1.00(0.89, 1.12) | 0.98(0.89, 1.08) | 0.733 |
| Secondary                               | 30(10.99) | 243(89.01) | 1.00(0.89, 1.12) | 1.03(0.93, 1.14) | 0.548 |
| Tertiary                                | 16(26.67) | 44(73.33)  | 0.82(0.68, 0.98) | 1.00(0.87, 1.14) | 0.992 |
| <b>Marital Status</b>                   |           |            |                  |                  |       |
| Never Married                           | 20(20.62) | 77(79.38)  | Ref              | Ref              |       |
| Married                                 | 41(11.08) | 330(88.92) | 0.89(0.81, 0.99) | 1.00(0.93, 1.08) | 0.987 |
| Separated                               | 2(7.69)   | 24(92.31)  | 1.04(0.92, 1.17) | 0.97(0.85, 1.11) | 0.626 |
| Widower/widow                           | 3(13.04)  | 20(87.98)  | 0.98(0.83, 1.15) | 1.03(0.92, 1.15) | 0.605 |
| <b>Monthly income (UGX)<sup>¶</sup></b> |           |            |                  |                  |       |
| 0-100,000                               | 42(16.03) | 220(83.97) | Ref              | Ref              |       |
| 100001-200,000                          | 8(8.99)   | 81(91.01)  | 1.08(0.99, 1.18) | 1.04(0.97, 1.11) | 0.245 |
| 200,001-300,000                         | 8(11.76)  | 60(88.24)  | 1.05(0.95, 1.16) | 0.99(0.93, 1.05) | 0.700 |
| 300,001-400,000                         | 3(8.82)   | 31(91.17)  | 1.09(0.97, 1.22) | 0.97(0.88, 1.06) | 0.504 |
| 400001-max                              | 5(7.81)   | 59(92.19)  | 1.10(1.00, 1.20) | 0.99(0.92, 1.06) | 0.781 |

207 *Note: CPR= \*Crude Prevalence Ratio, APR= \*\*Adjusted Prevalence Ratio. ¶1USD=3800 Uganda shillings*  
208 *(UGX)*

## 209 Discussion

210 Our findings show that there is a high prevalence of COVID-19 self-medication among urban slum  
211 dwellers. This was demonstrated by the fact that 87.2% of urban slum dwellers in Jinja city reported using  
212 self-medication. The high prevalence of self-medication may be a result of the challenges related to  
213 healthcare access brought about by the pandemic (high health costs, travel restrictions, and a shortage of  
214 health staff). Studies conducted in Bangladesh and Uganda found almost a similar prevalence to this current  
215 study of 88.3% [30] and 88% [31] respectively. Further, a study conducted among the general public found  
216 a decrease in self-medication practices during the COVID-19 pandemic lockdown compared to the practice  
217 before the lockdown [31]. This disparity could be explained by the fact that during the COVID-19  
218 lockdown, the public was not moving freely, making it difficult for them to obtain drugs. The prevalence  
219 of self-medication in our study, however, was way higher than that reported among residents of urban slums  
220 [32]. This discrepancy can be explained by the fact that both of these studies were conducted way before  
221 the COVID-19 pandemic which started almost three years later.

222 Factors found to be associated with self-medication for COVID-19 included age, sex, anxiety and or fear  
223 of quarantine, access to medical insurance, internet/advertisement, awareness of the laws regarding  
224 medicine use, family/ friend influence, and symptom severity. Our study revealed that respondents who  
225 were 50 years and older showed a 12% increase in the likelihood of self-medication compared to those in  
226 the 20-29 age bracket. This could be explained by the higher COVID-19 mortality among the elderly, hence  
227 creating a higher perceived risk among this population. In addition, older people are prone to chronic  
228 infections, thus being susceptible to infections like COVID-19 [33]. In addition, studies conducted in  
229 Uganda, Eritrea, Ethiopia, Nigeria, Belgrade and Cameroon have reported that as one gets older, they  
230 acquire accumulated knowledge due to disease experience [33-40]. Contrary studies have been done in  
231 Jabalpur [32] and Syrian [41], where individuals aged 18 to 40 years were more likely to self-medicate.  
232 This age difference could be due to the population dynamics of the respondents.

233 Our study showed that females were two times more likely to self-medicate than males. The reason for the  
234 association between being a female and self-medication is not known, but in the context of the COVID-19  
235 outbreak, greater anxiety among women, as described in Iran and Italy, cannot be excluded [42, 43]. In  
236 addition, this might have been due to the exacerbated stress among women associated with the COVID-19  
237 pandemic and efforts to mitigate its spread [44]. This is consistent with results in studies conducted in Spain  
238 and elsewhere that found that more females self-medicated compared to their counterparts [45, 46].  
239 However, there are controversial data on the relationship between sex and self-medication as studies  
240 conducted in Iran and the United Arab Emirates [47, 48] respectively did not report any association. This  
241 difference could be due to these studies having been conducted among different study populations.

242 In the current study, respondents who reported anxiety and fear of being quarantined had a 35% increase in  
243 the likelihood of self-medication compared to their counterparts. It is important to note that during the  
244 period under study, COVID-19-related morbidity and mortality were very high in Uganda and could have  
245 increased anxiety levels and fear of infection. Anxiety could have exacerbated self-medication as people  
246 tried their level best to prevent the infection, treat any present signs and symptoms, as well as boost

247 immunity to fight off disease. In addition, the mass fear of COVID-19, termed “corona phobia” [49-51]  
248 coupled with stringent infection prevention and control measures, was reported to have caused a lot of  
249 depression, confusion, fear, anger, and despair among people. This consequently resulted in substance use,  
250 which is self-medication [49]. Similar findings have been reported by other scholars [52-54].

251 This study found that having access to medical insurance was more protective compared to those who did  
252 not have medical insurance. At the peak of the second wave of COVID-19 in Uganda, the public healthcare  
253 system could not ably serve all confirmed and suspected COVID-19 cases effectively, since treatment was  
254 expensive in private facilities, people who had insurance accessed treatment easily in these private facilities,  
255 and those offered better services [55, 56]. The majority of those who accessed private facilities were likely  
256 to have medical insurance, as supported by findings of a study conducted in Iran [57].

257 The findings of this study show that individuals who reported access to the internet and advertisements  
258 showed a 13% increase in the likelihood of self-medication compared with those who did not. Comparable  
259 studies have been conducted in Iran and India [58, 59]. There was infodemia about the COVID-19  
260 pandemic due to much information in both digital and physical environments. This resulted in confusion  
261 and risk-taking behaviours that could harm health, foster distrust in health authorities or systems, and  
262 undermine the public health response, leading to self-medication [60, 61]. This information was used by  
263 the public as a replacement for medical consultations [59, 62]. In this response, the WHO designed a  
264 taxonomy to address infodemia, which was piloted in individual countries and WHO regions to generate  
265 localized insights and actions [60]. Furthermore, these findings indicated that the likelihood of self-  
266 medication for COVID-19 increased by 27% due to influence from family and friends. This finding reflects  
267 the familial clustering of the disease by the respondents since some reported self-medication for the  
268 prevention of COVID-19 infection. A possible reason is that family and friends tend to live together and  
269 often communicate with each other. Therefore, individuals who tested positive for COVID-19 might have  
270 taken the initiative to inform their recent acquaintances, who, under the scare of acquiring infection,  
271 resorted to self-medication in the hope of prevention [62-66].

272 Respondents who experienced minor and severe symptoms had a higher likelihood of 62% and 51%,  
273 respectively, of self-medicating compared to those who had no symptoms. These results mean that there  
274 was a high likelihood of self-medication among slum dwellers who either experienced minor or severe  
275 symptoms. Individuals with minor symptoms ignored the disease and thought that since it was not severe,  
276 they would easily recover in a short time. This is supported by studies conducted in Nigeria, and Ethiopia  
277 and a systematic review [36, 38, 67] respectively. On the other hand, those with severe symptoms viewed  
278 themselves as having the severe form of the disease that requires immediate attention and cannot be delayed  
279 due to issues of health facility access, affordability, drug stock-outs, and long waiting times. This is  
280 comparable to studies conducted in Brazil [68] and the USA [69]. Respondents who knew laws regarding  
281 medicine use were more likely to self-medicate, which is in line with a study conducted in Colombia [70].  
282 During the COVID-19 era, the greater access of people to the media, the internet, and their ability to  
283 understand information about the medicine and its related laws on use found on social networks may explain  
284 this finding. Since many patients get knowledge about drugs from previous prescriptions [71], physicians  
285 should limit superfluous prescriptions of antibiotics and implement guideline-based practices.

#### 286 **Limitations of the study**

287 The study had potential limitation. First, this study based on self-reporting, hence more likely to lead to  
288 social desirability bias because of stigma, anxiety, and fear. However, this was minimized by assuring the  
289 respondents before the study about information confidentiality, reviewing respondents' medical records  
290 while conducting data collection, and checking the Jinja City health database on COVID-19 test results.  
291 This study was conducted during the COVID-19 pandemic when people had fear and stigma about freely  
292 interacting with anyone for fear of contracting the disease. However, this was addressed by ensuring all the  
293 research assistants observed COVID-19 SOPs while in the field. These findings can be used to plan and  
294 manage future epidemics or any emergencies of public health concern and also guide the engagement of  
295 slum dwellers towards a reduction in the prevalence of self-medication. Therefore, these results could be  
296 generalizable to the general population of urban slum dwellers.

297 **Conclusion**

298 This study reports a very high prevalence of self-medication for COVID-19 among urban slum dwellers in  
299 Jinja City. This is a signal for potential future antimicrobial resistance outbreaks, especially in vulnerable  
300 groups like urban slum dwellers. Self-medication has been known to result in unintended healthcare  
301 outcomes such as antimicrobial resistance, adverse effects, drug interactions, and drug dependence, among  
302 others. According to WHO, the COVID-19 pandemic situation is likely to be prolonged for years and will  
303 have a huge effect on the social-economic and psychosocial impact on people's lifestyles and behaviour.  
304 This poses a more serious threat that might push people to self-medicate. Therefore, MoH and NDA should  
305 design stringent measures for the prescription, sale, and use of medicine, not forgetting to regulate  
306 advertisements in addition to sensitization of the slum dwellers.

307 **Recommendations**

308 Based on the findings, the researchers suggest the following recommendations to the Ugandan government  
309 and other stakeholders. The Ministry of Health needs to adopt WHO-approved guidance on the detection  
310 of info-demic signals and implement medical insurance policy to benefit the most vulnerable populations  
311 like slum dwellers. The National Drugs Authority (NDA) should put in place stringent mechanisms to  
312 regulate the prescription, sale, hawking, and use of conventional medicines, especially antibiotics. Also,  
313 NDA should liaise with herbal medicine practitioners to establish active elements in socially acceptable  
314 and effective herbal medicines. The City Health Team (CHT) should control and manage the sale of any  
315 medicine by conducting routine inspections, routine support supervision of all sellers of medicines and  
316 mass sensitisation of all stakeholders. During health crises, such as the COVID-19 pandemic, slum dwellers  
317 and the general public ought to practice good health-seeking behaviours.

318

319

## References

1. WHO, *World Health Organization situation report (Corona virus disease)*. 2023.
2. WHO. *WHO recommends two new drugs to treat COVID-19, 14 January 2022 Statement, Geneva, Accessed 5th March 2022*. 2022.
3. Elayeete, S., et al., *Comparative epidemiologic analysis of COVID-19 patients during the first and second waves of COVID-19 in Uganda*. IJID Regions, 2022. **3**: p. 160-167.
4. Bongomin, F., et al. *High mortality during the second wave of the coronavirus disease 2019 (COVID-19) pandemic in Uganda: experience from a national referral COVID-19 treatment unit*. in *Open Forum Infectious Diseases*. 2021. Oxford University Press US.
5. MOH, *Corona virus pandemic, Covid-19 [Online]*. Available: <https://www.health.go.ug/covid/> [Accessed 07/03 2023]. 2023.
6. Kaye, A.D., et al., *Economic impact of COVID-19 pandemic on healthcare facilities and systems: International perspectives*. Best Practice & Research. Clinical Anaesthesiology, 2020.
7. Liu, F., M. Wang, and M. Zheng, *Effects of COVID-19 lockdown on global air quality and health*. Science of the Total Environment, 2021. **755**: p. 142533.
8. Chu, I.Y.-H., et al., *Social consequences of mass quarantine during epidemics: a systematic review with implications for the COVID-19 response*. Journal of travel medicine, 2020. **27**(7): p. taaa192.
9. Sindhuja, P., et al., *COVID-19 AND HEALTH CARE SERVICES IN RURAL INDIA: CHALLENGES AND CONSEQUENCES*. Turkish Online Journal of Qualitative Inquiry, 2021. **12**(4).
10. WHO, *World Health Organization. (2000). Guidelines for the regulatory assessment of medicinal products for use in self-medication*. World Health Organization. 2000.
11. WHO, *Guidelines for the regulatory assessment of medicinal products for use in self-medication*. 2000, World Health Organization.
12. Eticha, T. and K. Mesfin, *Self-medication practices in Mekelle, Ethiopia*. PloS one, 2014. **9**(5): p. e97464.
13. Bashige CV, M.M., Bakari AS, Sangwa KG, Kahumba BJ, Pierre D, Lumbu SJB, *Prévalence et caractéristiques de l'automédication chez les étudiants de 18 à 35 ans résidant au campus de la Kasapa de l'Université de Lubumbashi*. Pan Afr Med, 21, 77. . 2015. **12**(2): p. 007-020.
14. Chouhan, K. and S.B. Prasad, *Self-medication and their consequences: a challenge to health professional*. Asian J Pharm Clin Res, 2016. **9**(2): p. 314-317.
15. De Sanctis, V., et al., *Prevalence, attitude and practice of self-medication among adolescents and the paradigm of dysmenorrhea self-care management in different countries*. Acta Bio Medica: Atenei Parmensis, 2020. **91**(1): p. 182.
16. Selvaraj, K.K., S.G.; Ramalingam, A. , *Prevalence of self-medication practices and its associated factors in Urban Puducherry, India*. Perspect. Clin. Res. 2014, 5, 32–36. 2014.
17. UBOS, *Statistical Abstract: Uganda Bureau of statistics 2020*.
18. Adams, A.M., et al., *Healthcare seeking for chronic illness among adult slum dwellers in Bangladesh: A descriptive cross-sectional study in two urban settings*. PloS one, 2020. **15**(6): p. e0233635.
19. van der Heijden, J., et al., *'Working to stay healthy', health-seeking behaviour in Bangladesh's urban slums: a qualitative study*. BMC Public Health, 2019. **19**(1): p. 1-13.
20. Bawah, A.T., et al., *Prevalence of diabetes among homeless and slum dwellers in Accra, Ghana: a survey study*. BMC research notes, 2019. **12**(1): p. 1-5.
21. Mijumbi-Deve R, K.I., Nankya E, Sewankambo N. , *Primary health care systems (PRIMASYS): case study from Uganda*. World Health Organization; 2017 [cited 2023 March 12]. Available from: <https://www.who.int/alliance-hpsr/projects/primasys/en/>. 2021.
22. Kish, L., *Survey sampling*. 1965.



23. Oniba, O.R., *Factors Influencing Self-medication Practices Among Adults in Urban Slum Households*. 2012, International Health Sciences University.
24. Dreier, M., et al., *Development and evaluation of e-mental health interventions to reduce stigmatization of suicidality—a study protocol*. BMC psychiatry, 2019. **19**(1): p. 1-12.
25. Ahmed, S.H., et al., *The prevalence of selected risk factors for non-communicable diseases in Hargeisa, Somaliland: a cross-sectional study*. BMC Public Health, 2019. **19**: p. 1-10.
26. Quispe-Cañari, J.F., et al., *Self-medication practices during the COVID-19 pandemic among the adult population in Peru: A cross-sectional survey*. Saudi pharmaceutical journal, 2021. **29**(1): p. 1-11.
27. Fernando, A., et al., *A descriptive study of self-medication practices among Sri Lankan national level athletes*. BMC research notes, 2017. **10**: p. 1-12.
28. Ngigi, C.K., P. Mwangiru, and J. Wala, *Self-medication with antibiotics prior to seeking treatment among adult patients attending outpatient department at gatundu sub-county hospital, Kiambu County, Kenya*. Imp J Interdiscip Res, 2016. **2**.
29. Lakshminarasimhappa, M., *Web-based and smart mobile app for data collection: Kobo Toolbox/Kobo collect*. Journal of Indian Library Association, 2022. **57**(2): p. 72-79.
30. Nasir, M., A. Chowdhury, and T. Zahan, *Self-medication during COVID-19 outbreak: a cross sectional online survey in Dhaka city*. Int J Basic Clin Pharmacol, 2020. **9**(9): p. 1325-30.
31. Dare, S.S., et al., *COVID-19 pandemic and behavioural response to self-medication practice in Western Uganda*. medRxiv, 2021.
32. Jain, S., et al., *Prevalence of self-medication practices among the residents of urban slums located near govt. medical college, Jabalpur*. Int J Community Med Public Health, 2018. **5**: p. 811-7.
33. Lukovic JA, M.V., Pekmezovic T, Trajkovic G, Ratkovic N, Aleksic D, Grgurevic A. , *Self-medication practices and risk factors for self-medication among medical students in Belgrade, Serbia*. PLoS One. 2014 Dec 11;9(12):e114644. doi: 10.1371/journal.pone.0114644. PMID: 25503967; PMCID: PMC4263675. 2014.
34. Niwandinda, F., et al., *Patterns and practices of self-medication among students enrolled at Mbarara University of Science and Technology in Uganda*. Integrated pharmacy research & practice, 2020. **9**: p. 41.
35. Araia, Z.Z., N.K. Gebregziabher, and A.B. Mesfun, *Self medication practice and associated factors among students of Asmara College of Health Sciences, Eritrea: a cross sectional study*. Journal of Pharmaceutical Policy and Practice, 2019. **12**(1): p. 3.
36. Kifle, Z.D., et al., *Self-medication practice and associated factors among private health sciences students in Gondar Town, North West Ethiopia. A Cross-Sectional Study*. INQUIRY: The Journal of Health Care Organization, Provision, and Financing, 2021. **58**: p. 00469580211005188.
37. Ocan, M., et al., *Patterns and predictors of self-medication in northern Uganda*. PloS one, 2014. **9**(3): p. e92323.
38. Oche, O.M., et al., *Prevalence and factors associated with self medication among people living in urban slums of Sokoto Metropolis, Sokoto State, Nigeria*. Cent African J Public Heal, 2019. **5**(6): p. 302-309.
39. Jerez-Roig, J., et al., *Prevalence of self-medication and associated factors in an elderly population: a systematic review*. Drugs & aging, 2014. **31**(12): p. 883-896.
40. Kong, J.D., et al., *SARS-CoV-2 and self-medication in Cameroon: a mathematical model*. Journal of biological dynamics, 2021. **15**(1): p. 137-150.
41. Abdelwahed, R.N., M. Jassem, and A. Alyousbashi, *Self-medication practices, prevalence and associated factors among Syrian adult patients: a cross-sectional study*. 2022.
42. Moghanibashi-Mansourieh, A., *Assessing the anxiety level of Iranian general population during COVID-19 outbreak*. Asian journal of psychiatry, 2020. **51**: p. 102076.
43. Casagrande M, F.F., Tambelli R, Forte G. , *The enemy who sealed the world: Effects quarantine due to the COVID-19 on sleep quality, anxiety, and psychological distress in the Italian population*. Sleep Med. 2020. 2020.

44. Bochicchio, L.A., et al., *Understanding alcohol and marijuana use among sexual minority women during the COVID-19 pandemic: A descriptive phenomenological study*. Journal of Homosexuality, 2021. **68**(4): p. 631-646.
45. Behzadifar, M., et al., *Prevalence of self-medication in university students: systematic review and meta-analysis*. East Mediterr Health J, 2020. **26**(7): p. 846-57.
46. Sadio, A.J., et al., *Assessment of self-medication practices in the context of the COVID-19 outbreak in Togo*. BMC public health, 2021. **21**(1): p. 1-9.
47. Abdi, A., et al., *Prevalence of self-medication practice among health sciences students in Kermanshah, Iran*. BMC pharmacology and Toxicology, 2018. **19**(1): p. 1-7.
48. Sridhar, S.B., et al., *Assessment of nature, reasons, and consequences of self-medication practice among general population of Ras Al-Khaimah, UAE*. International Journal of Applied and Basic Medical Research, 2018. **8**(1): p. 3.
49. Sarkar, A. and J.K. Rajamani, *Assessment of Psychology, Behaviour and Self-Medication Potential Among Indian People During COVID-19 Pandemic*. Biomedical and Pharmacology Journal, 2021. **14**(4): p. 2285-2295.
50. Amin, S., *The psychology of coronavirus fear: Are healthcare professionals suffering from coronavirus phobia?* International Journal of Healthcare Management, 2020. **13**(3): p. 249-256.
51. Heiat, M., et al., *Phobia and Fear of COVID-19: origins, complications and management, a narrative review*. Annali Di Igiene Medicina Preventiva E Di Comunita, 2021. **33**(4): p. 360-370.
52. Wegbom, A.I., et al., *Self-Medication Practices and Associated Factors in the Prevention and/or Treatment of COVID-19 Virus: A Population-Based Survey in Nigeria*. Frontiers in Public Health, 2021. **9**.
53. Chopra, D., et al., *Prevalence of self-reported anxiety and self-medication among upper and middle socioeconomic strata amidst COVID-19 pandemic*. Journal of education and health promotion, 2021. **10**: p. 73-73.
54. Mbazzi, F.B., et al., *The impact of COVID-19 measures on children with disabilities and their families in Uganda*. Disability & Society, 2020: p. 1-24.
55. Davalbhakta, S., et al., *Private health sector in India-ready and willing, yet underutilized in the covid-19 pandemic: a cross-sectional study*. Frontiers in Public Health, 2020. **8**: p. 571419.
56. Ilesanmi, O.S. and A.A. Afolabi, *Positioning the private health facilities towards continuous service provision during the COVID-19 pandemic*. Hospital Practices and Research, 2020. **5**(4): p. 122-125.
57. Karimy, M., et al., *Risk factors associated with self-medication among women in Iran*. BMC Public Health, 2019. **19**(1): p. 1033.
58. Soroush, A., et al., *Exploring the perceived factors that affect self-medication among nursing students: a qualitative study*. BMC nursing, 2018. **17**(1): p. 1-7.
59. Agarwal, T., et al., *Use of internet for practice of self-medication: We are heading toward an era of internet pharmacy*. Medical Journal of Dr. DY Patil Vidyapeeth, 2021. **14**(1): p. 36.
60. Purnat, T.D., et al., *Infodemic signal detection during the COVID-19 pandemic: development of a methodology for identifying potential information voids in online conversations*. JMIR infodemiology, 2021. **1**(1): p. e30971.
61. Calleja, N., et al., *A public health research agenda for managing infodemics: methods and results of the first WHO infodemiology conference*. JMIR infodemiology, 2021. **1**(1): p. e30979.
62. Malik, M., et al., *Self-medication during Covid-19 pandemic: challenges and opportunities*. Drugs & Therapy Perspectives, 2020. **36**(12): p. 565-567.
63. Lei, X., et al., *Self-medication practice and associated factors among residents in Wuhan, China*. International journal of environmental research and public health, 2018. **15**(1): p. 68.
64. Kassie, A.D., B.B. Bifftu, and H.S. Mekonnen, *Self-medication practice and associated factors among adult household members in Meket district, Northeast Ethiopia, 2017*. BMC Pharmacology and Toxicology, 2018. **19**(1): p. 1-8.

65. Zhang, A., et al., *Self-medication with antibiotics for protection against COVID-19: the role of psychological distress, knowledge of, and experiences with antibiotics*. *Antibiotics*, 2021. **10**(3): p. 232.
66. Goodwin, R., et al., *Anxiety, perceived control and pandemic behaviour in Thailand during COVID-19: Results from a national survey*. *Journal of Psychiatric Research*, 2021. **135**: p. 212-217.
67. Quincho-Lopez, A., et al., *Self-medication practices to prevent or manage COVID-19: A systematic review*. *PloS one*, 2021. **16**(11): p. e0259317.
68. Pastore, G.P., et al., *Self-medication among myofascial pain patients: a preliminary study*. *The Open Dentistry Journal*, 2018. **12**: p. 347.
69. Nishith, P., et al., *A test of self-medication hypothesis for drug use in homeless persons: the role of severe mental illness*. *Journal of Social Distress and Homelessness*, 2022: p. 1-8.
70. Machado-Alba, J.E., et al., *Social, cultural and economic factors associated with self-medication*. *Biomédica*, 2014. **34**(4): p. 580-588.
71. Nepal, G. and S. Bhatta, *Self-medication with antibiotics in WHO Southeast Asian Region: a systematic review*. *Cureus*, 2018. **10**(4).
